# Supplementary material
Source: PubMed Central journal article supplement (PMC4847981)
Supplement: kcbt-17-03-1139247-s001.pdf [file kcbt-17-03-1139247-s001.pdf]

## Supplemental Figures

|                         |   |   |   |    |    |    |     |
|-------------------------|---|---|---|----|----|----|-----|
| capep ( $\mu\text{M}$ ) | - | - | 5 | 10 | 25 | 50 | 100 |
| T Ag                    | - | + | + | +  | +  | +  | +   |

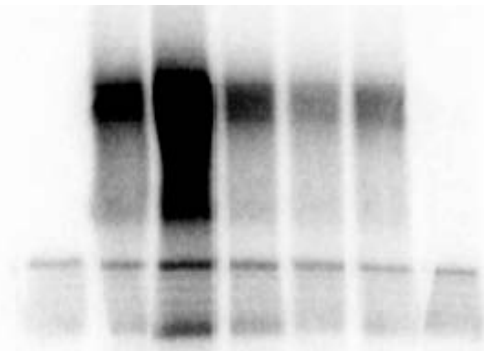

**Supplemental Figure 1.** Neutral agarose gel analysis of the replication intermediates produced from the *in vitro* SV40 replication assay in the presence of increasing concentrations of caPeptide.

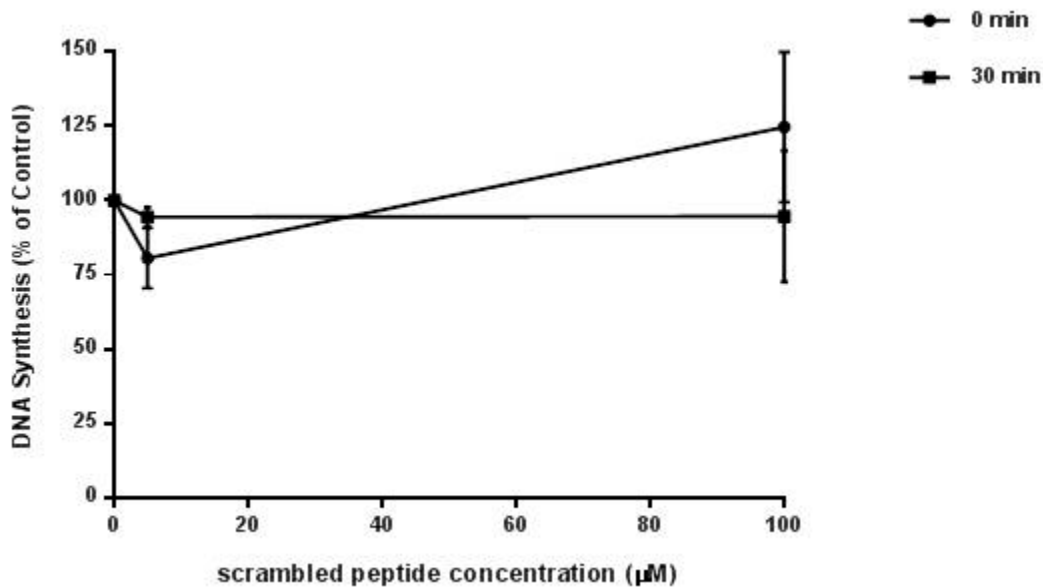

**Supplemental Figure 2.** Effect of scrambled peptide treatment, either pre-incubated for 30 minutes or without pre-incubation. Products were analyzed as described previously in the Materials and Methods section. One unit of *in vitro* SV40 DNA synthesis activity is equivalent to 30 pmol of total radionucleotide incorporation per hour at 37°C. % Control is based on the control reaction performed in the absence of scrambled peptide. Each point represents the average  $\pm$  standard deviation of three to five experiments.

|                         |   |   |      |      |      |      |      |
|-------------------------|---|---|------|------|------|------|------|
| capep ( $\mu\text{M}$ ) | - | - | 0.25 | 0.50 | 1.00 | 2.50 | 5.00 |
| T Ag                    | - | + | +    | +    | +    | +    | +    |

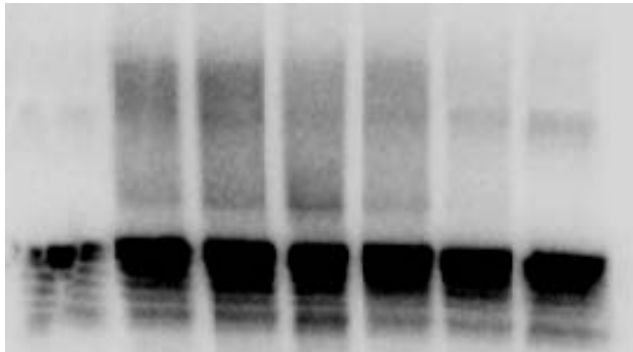

**Supplemental Figure 3.** Neutral agarose gel analysis of the replication intermediates produced from the *in vitro* SV40 replication assay following treatment with increasing concentrations of caPeptide after a 30 minute pre-incubation with HeLa nuclear extract.

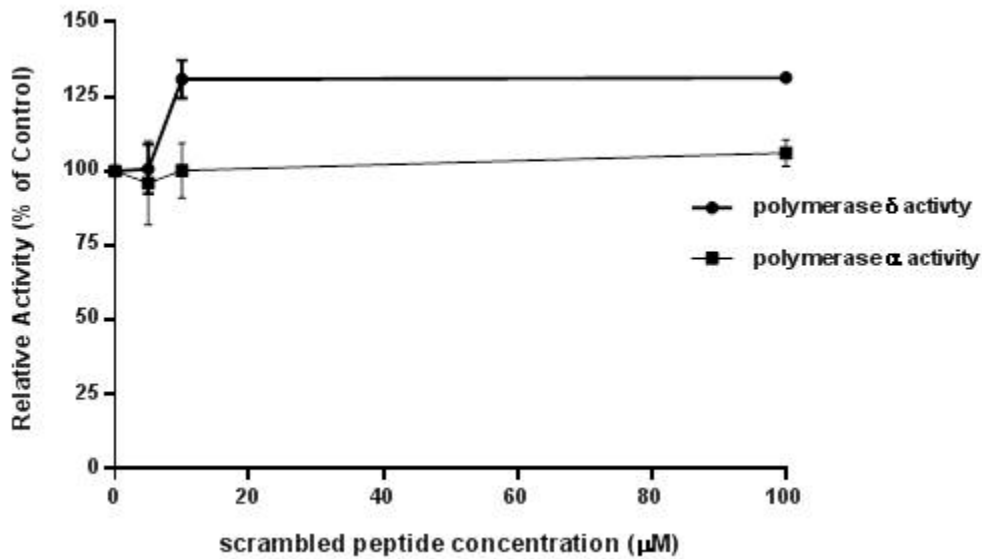

**Supplemental Figure 4.** Effect of scrambled peptide on the synthesize-associated DNA polymerase  $\alpha$  and polymerase  $\delta$  activity. Prior to the assay, HeLa nuclear extract was pre-incubated for 30 minutes with increasing concentrations of scrambled peptide. Control reactions were performed in the absence of scrambled peptide. Each point represents the average  $\pm$  standard deviation of three to five experiments.
